# Supplementary material
Source: publisher site journal article supplement (https://www.spandidos-publications.com/3107/downloadSupplementary)

Figure S1. Flow chart of experimental procedure. ICH, intracerebral hemorrhage; mNSS, modified neurological severity score; TEM, transmission electron microscopy; EA, electroacupuncture; 3-MA, 3-methyladenine.

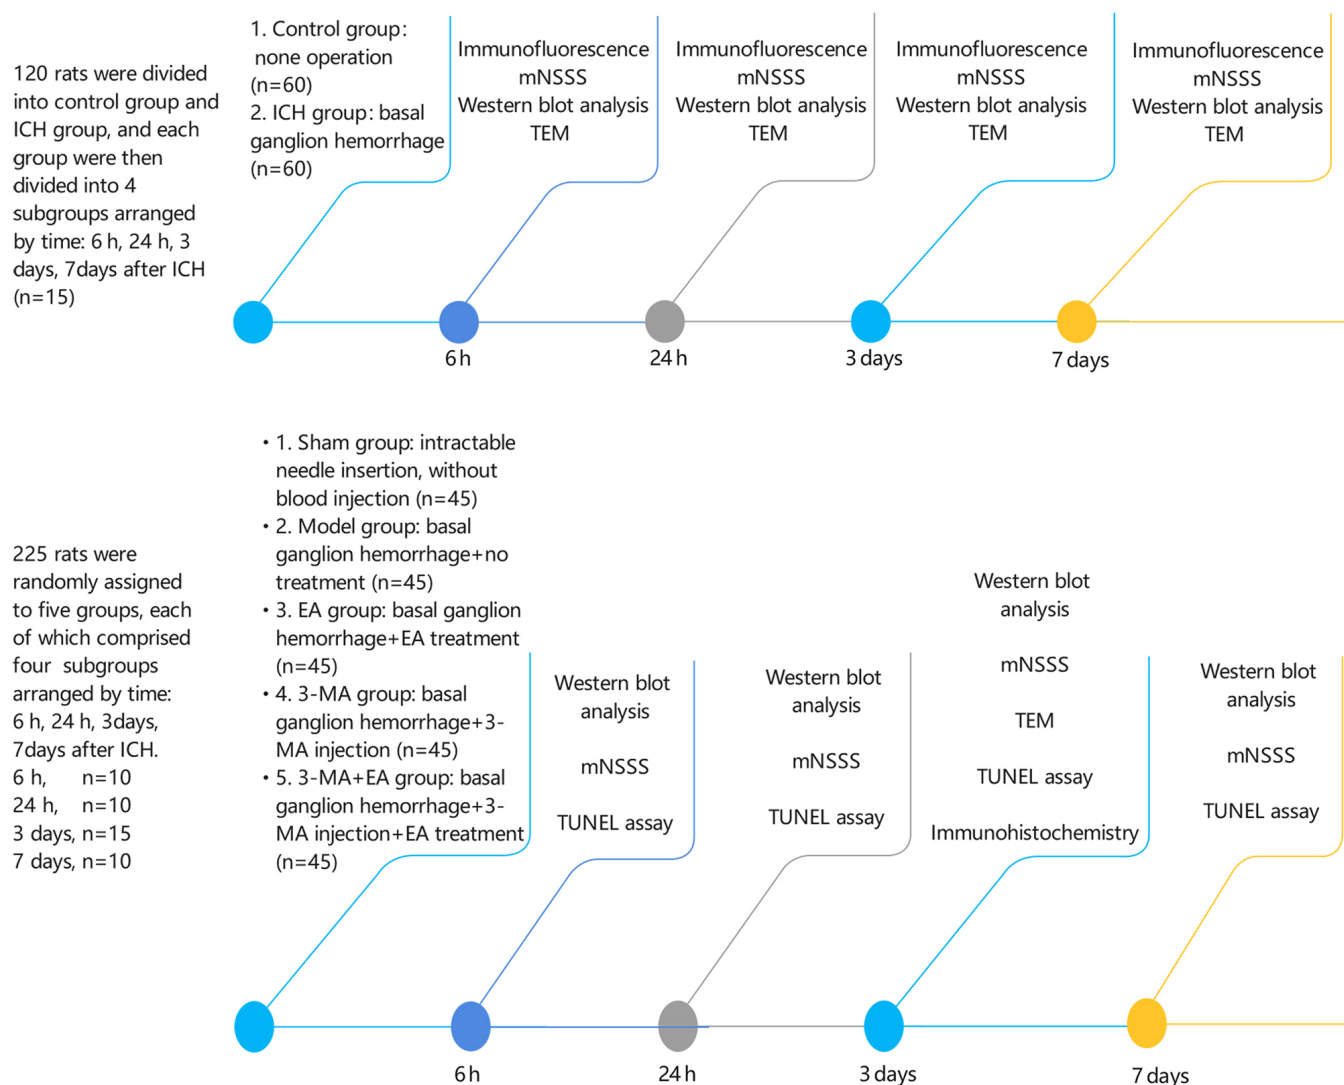

Supplement: Supplementary file 1 [file downloadSupplementary]
